# Supplementary material for: Intensified paraglacial slope failures due to accelerating downwasting of a temperate glacier in Mt. Gongga, southeastern Tibetan Plateau
Source: Copernicus journal article supplement (doi:10.5194/esurf-10-23-2022), 2022-01-11
Supplement: Supplementary file 1 [file esurf-10-23-2022-supplement.pdf]

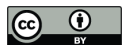

*Supplement of*

**Intensified paraglacial slope failures due to accelerating downwasting of a temperate glacier in Mt. Gongga, southeastern Tibetan Plateau**

**Yan Zhong et al.**

*Correspondence to:* Qiao Liu (liuqiao@imde.ac.cn)

The copyright of individual parts of the supplement might differ from the article licence.

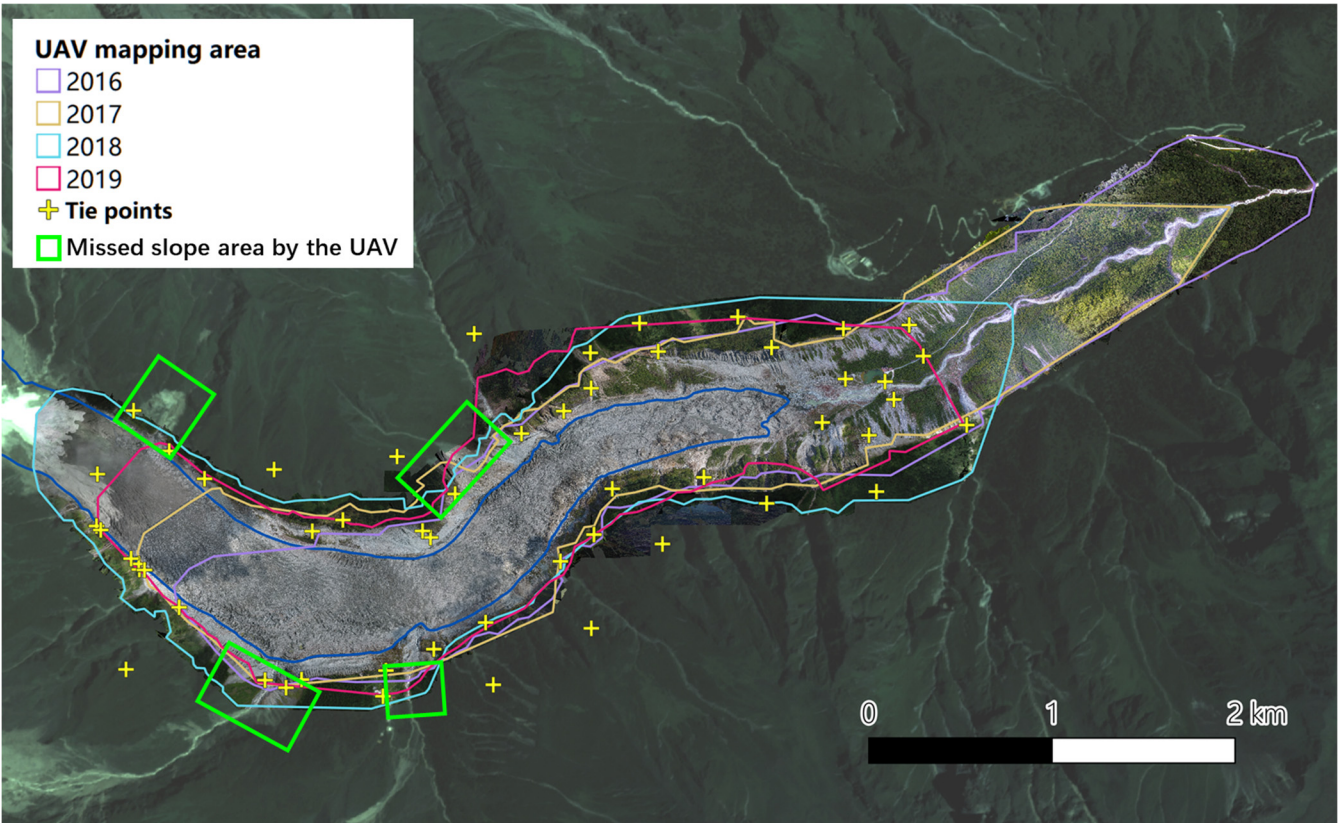

25 Fig. S1: Spatial extents of the four repeated UAV surveys by Qiao Liu et al. and the distribution of tie points selected for imagery co-registration. Note the ‘tie points’ outside the UAV mapping areas were only used for extrapolation but not for co-registration.

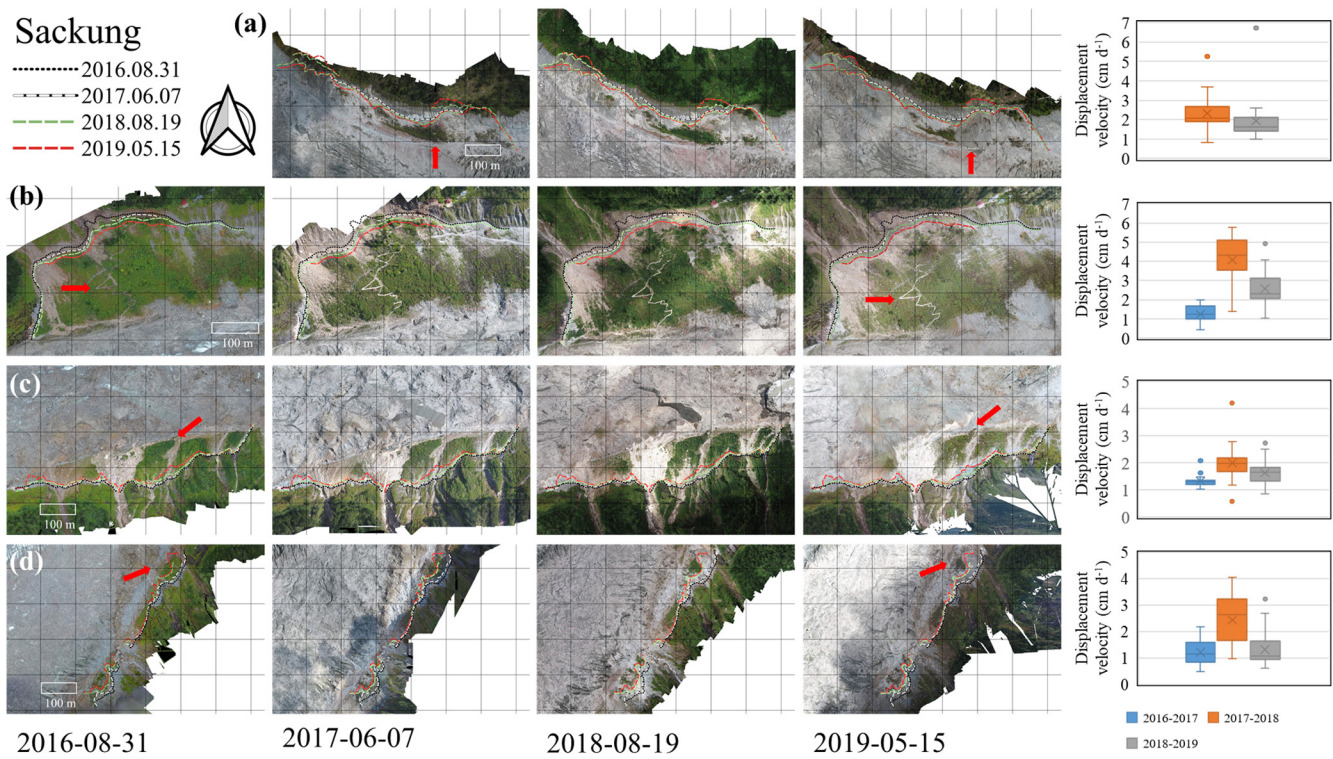

**Figure S2: Slopes slides and its velocity of type B. (a) B1, (b) B2, (c) B3, (d) B4 based on UAV images.**



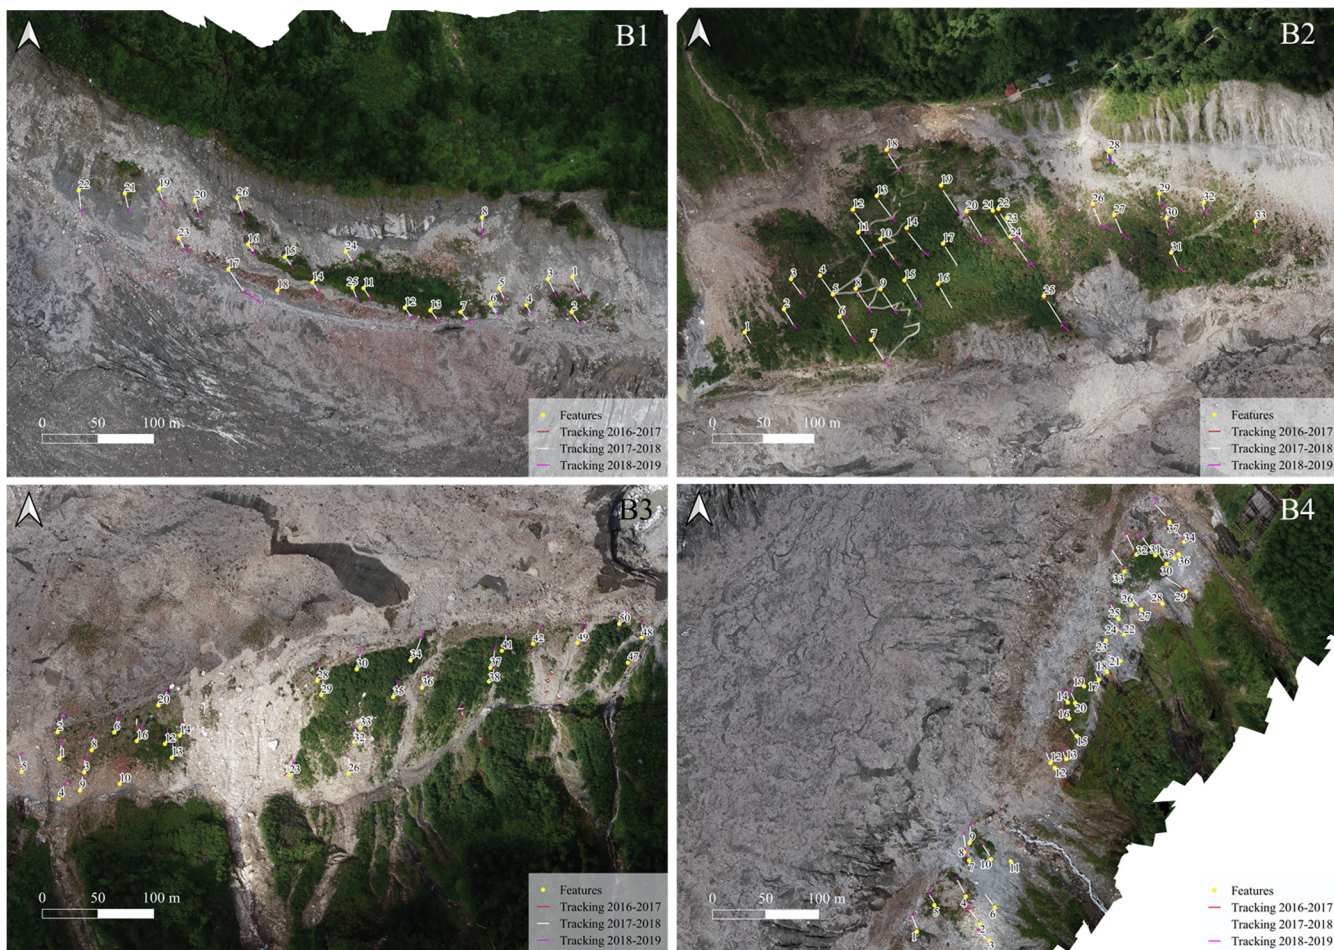

30 **Fig. S3: Tie points for manually tracked the displacement of the four slopes (B1-B4 in Fig. 6) in UAV imagery.**



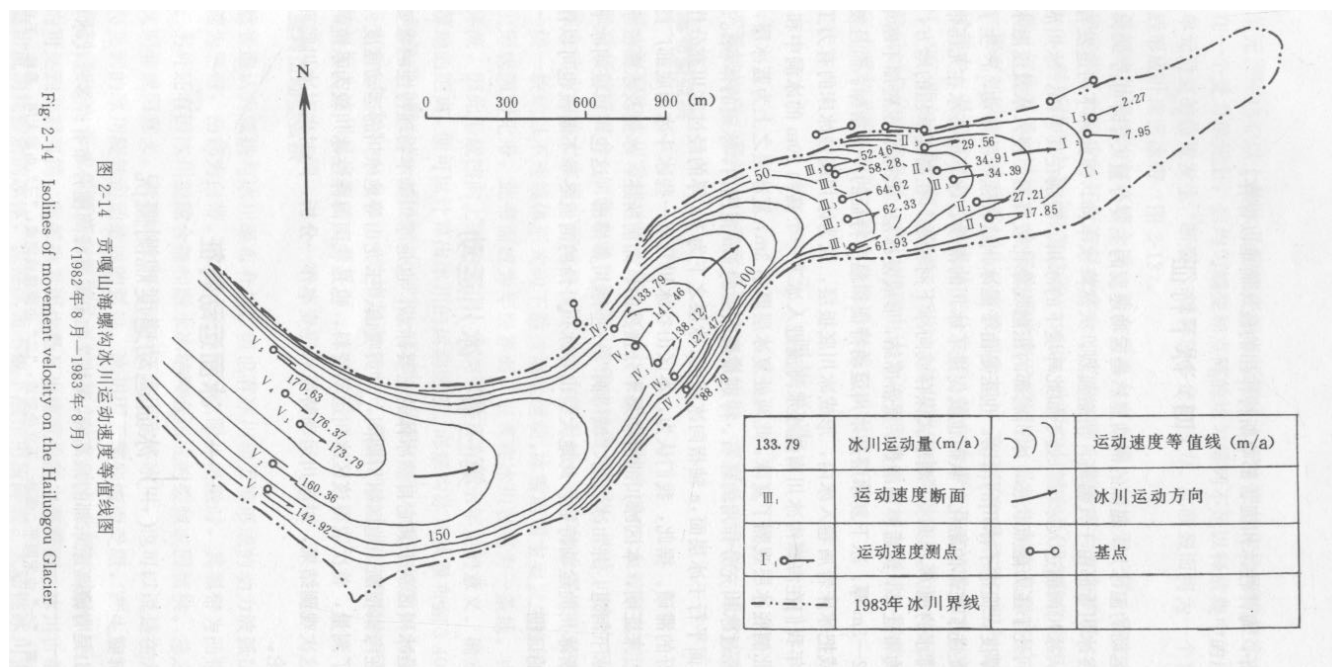

Fig. S4: The scanned picture of HLG velocity between 1982 and 1983.

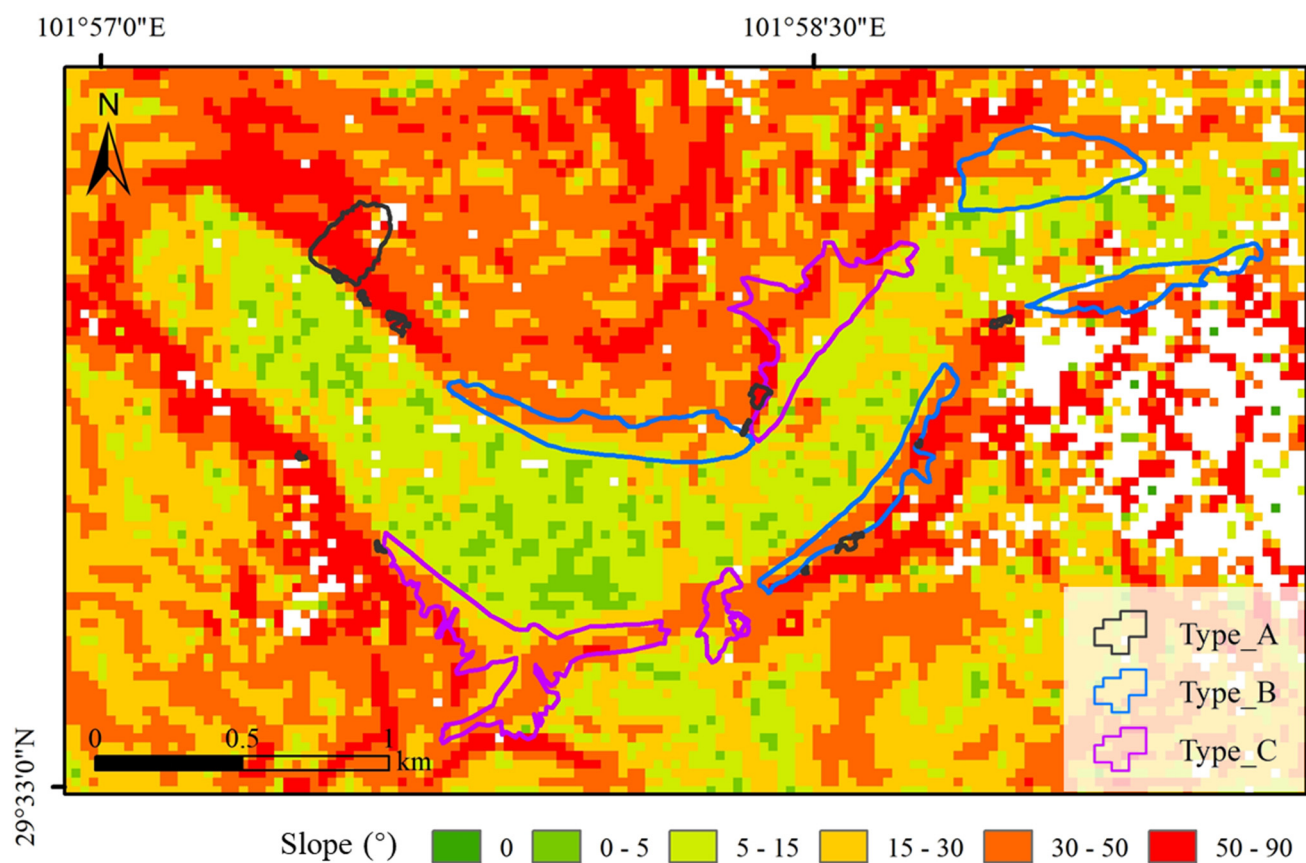

35 Fig. S5: Surface gradient map based on the 2016 DEM derived using 2000 SRTM and the 2000-2016 surface elevation change rate from Brun et al. (2017).

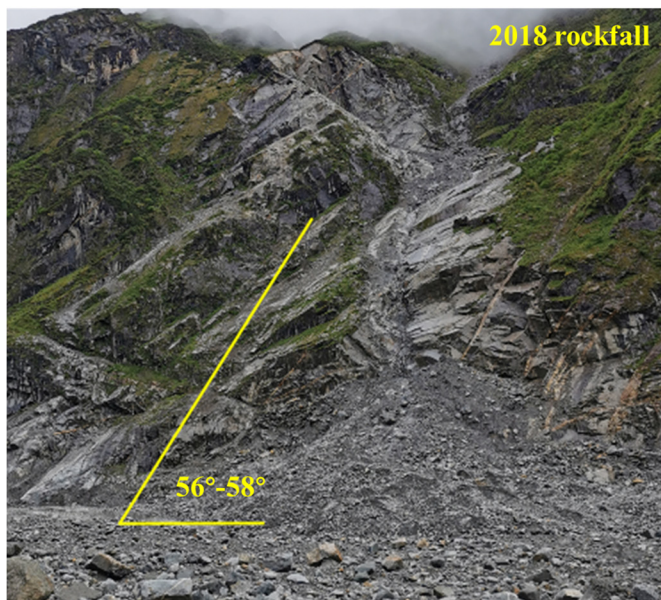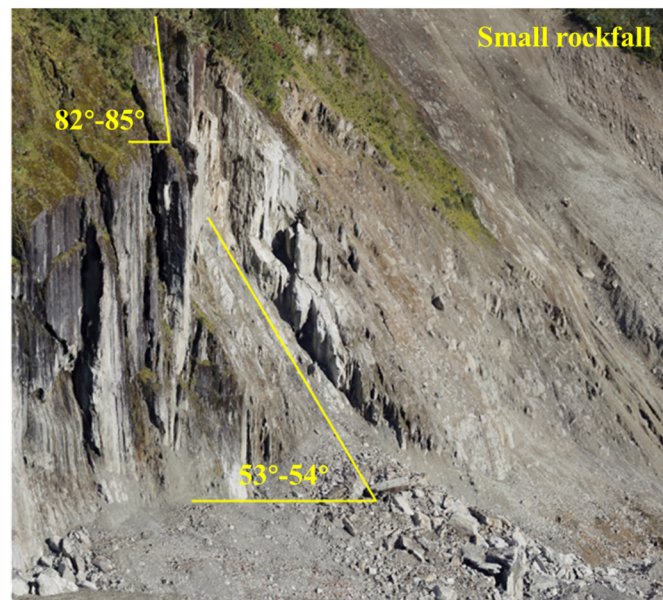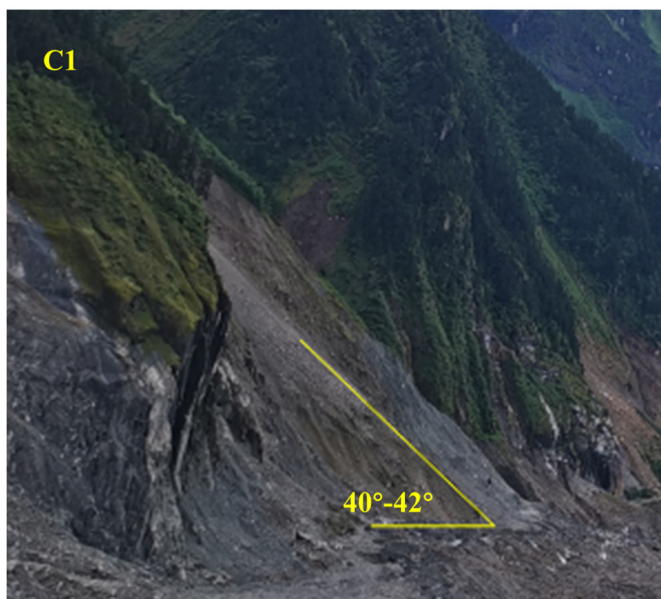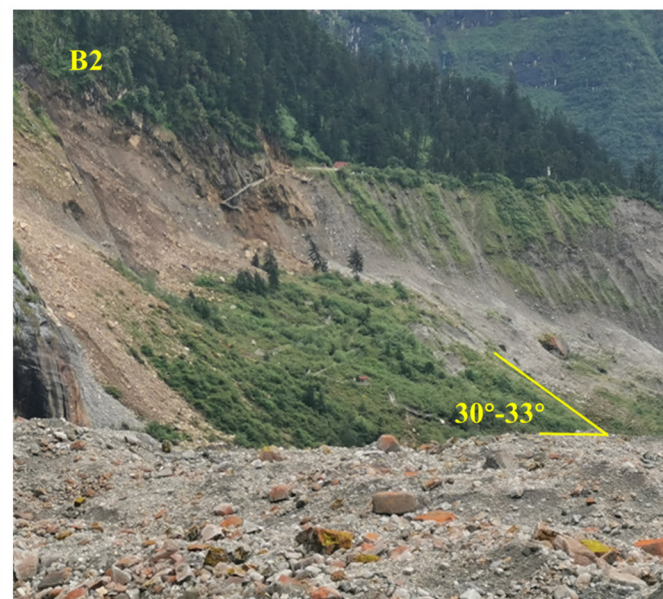

40 Fig. S6: The slope angles of some PSF in field investigation, photographs by Yan Zhong.



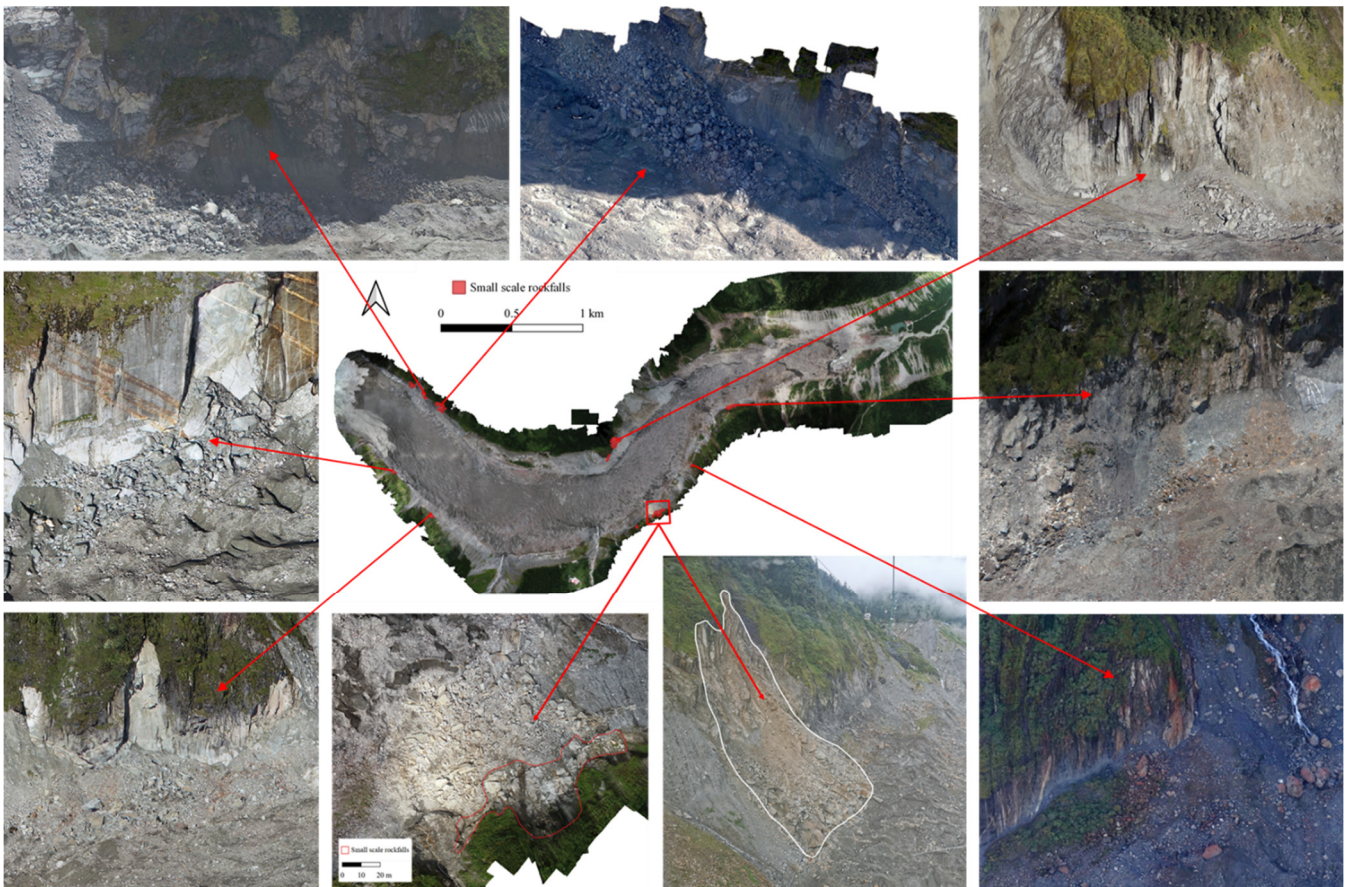

**Fig. S7: Detected small magnitude rockfalls from UAV- and field-photographs.**

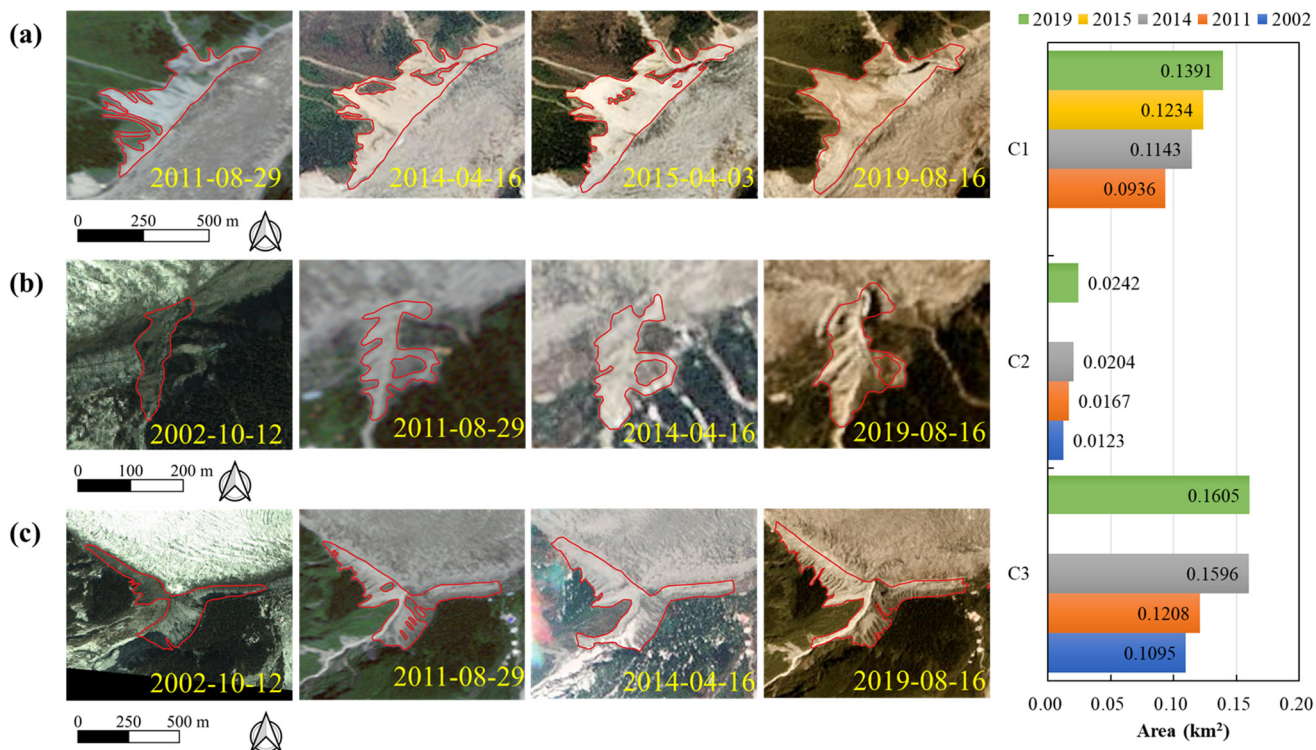

Fig. S8: Slopes range and area changes of type C. (a) C1, (b) C2, (c) C3 based on RapidEye, PlanetScope and © Google Earth (SPOT5) images.



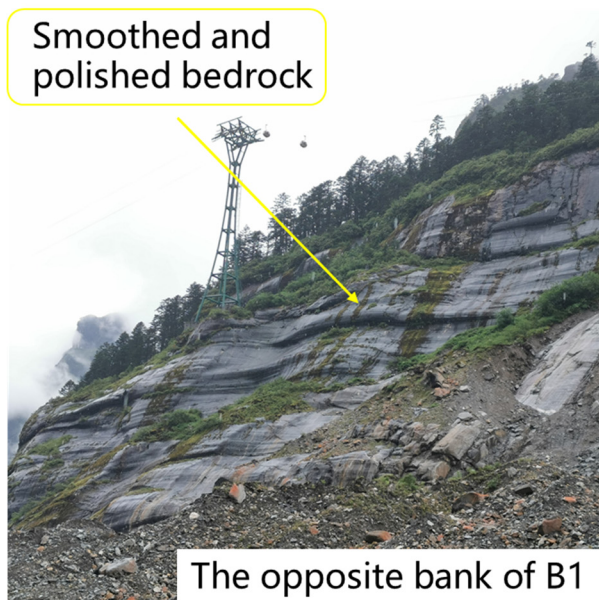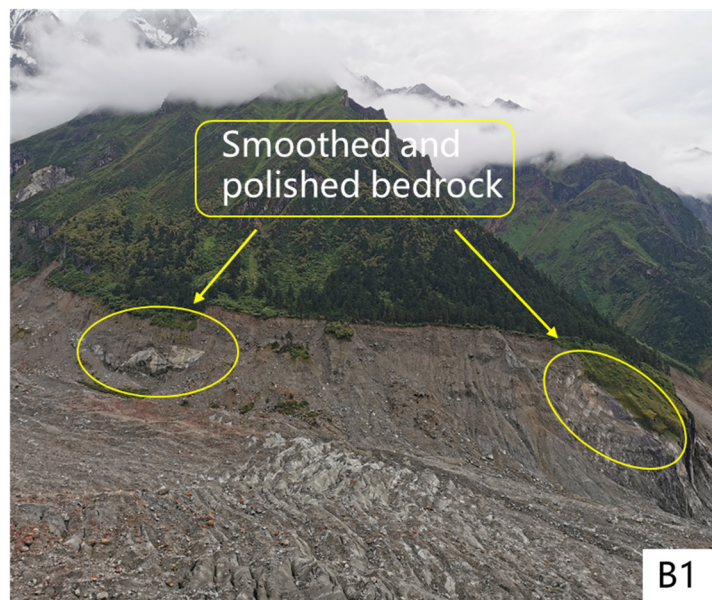

**Fig. S9: Glacially smoothed and polished bedrock surfaces with steep inclination angles in B1 and its opposite bank, photographs by Yan Zhong.**



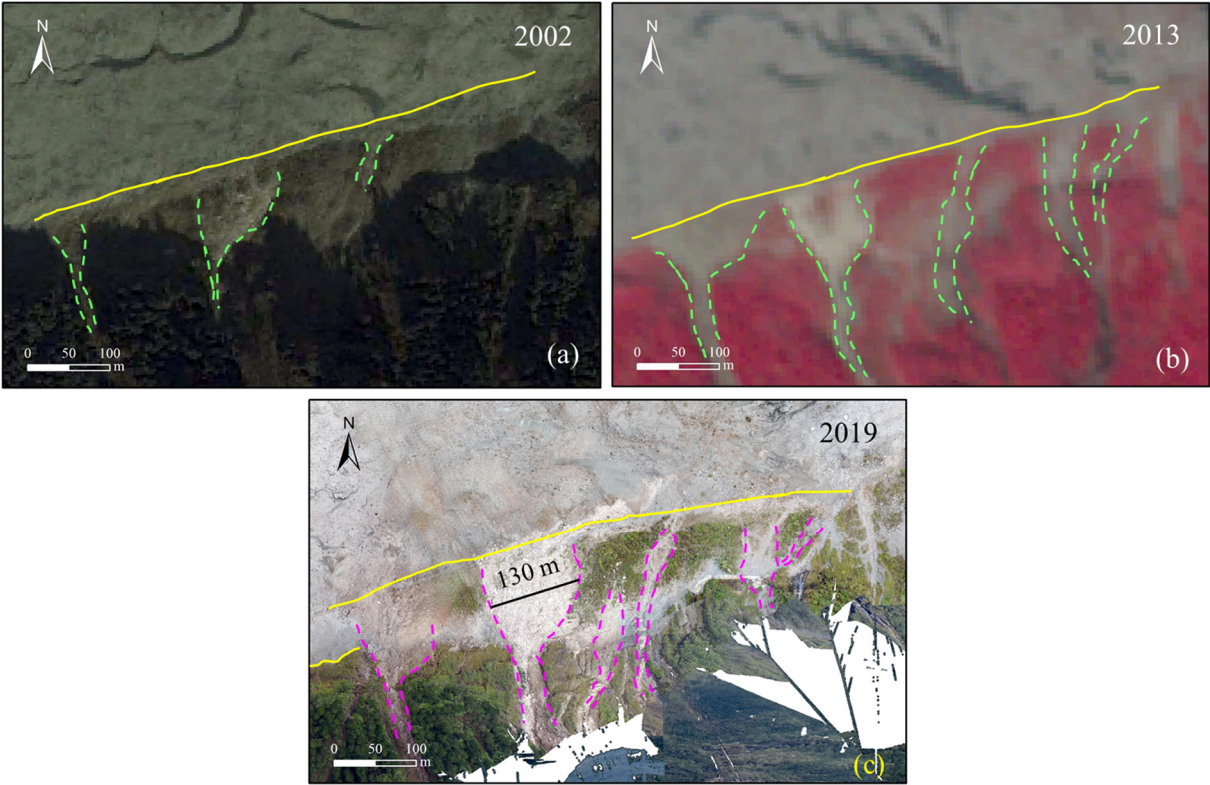

**Fig. S10:** The gully developing process within B3 between 2002, 2013, and 2019, UAV imagery by Qiao Liu et al.



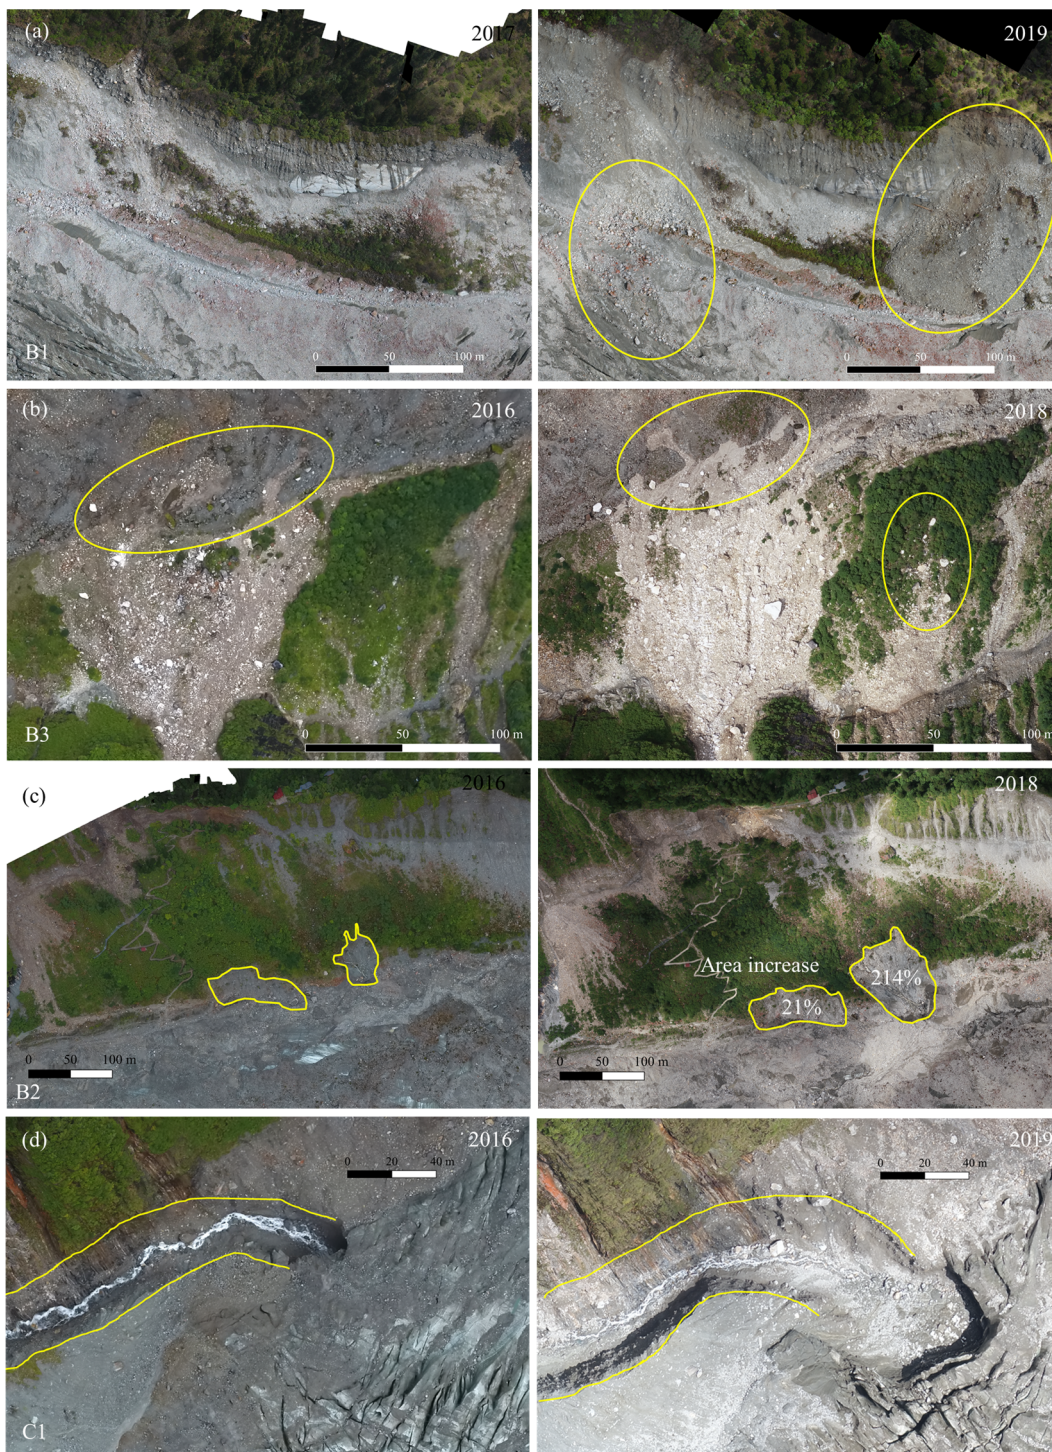

55 **Fig. S11: A limited number of materials that are delivered to the supraglacial or sub-glacial environment through (a) direct rolled (the sediments are more dispersed compared to rockfalls), (b) collapse, (c) debris flow (faster changes), and (d) stream, UAV imagery by Qiao Liu et al.**

Supplemental Table

60 Tab. S1 PSF classification

| Categories |                        | Sub-categories |                                              | Classification Standard                                                                                                   | Classification Result |
|------------|------------------------|----------------|----------------------------------------------|---------------------------------------------------------------------------------------------------------------------------|-----------------------|
| ID         | Name                   | ID             | Name                                         |                                                                                                                           |                       |
| 1.0        | Rock slope failure     |                |                                              | Large-scale, catastrophic rock slope failure                                                                              |                       |
|            |                        | 1.1            | Rock avalanche                               | Volume class: $\geq 10^6$ (m <sup>3</sup> )<br>(Deline et al., 2015)                                                      | -                     |
|            |                        | 1.2            | Rock fall                                    | Local-scale, high-frequency, and discrete rockfalls<br>Volume class: $\leq 10^6$ (m <sup>3</sup> )<br>(McColl, 2012)      | A                     |
|            |                        | 1.3            | Deep-seated gravitational slope deformations | Extremely slow flows or displacements of bedrock<br>(McColl, 2012)                                                        | -                     |
| 2.0        | Sediment slope failure | 2.1            | Sediment-mantled slope slide                 | Rock mass slides along the shear plane<br>Shape: arc or strip<br>(Ballantyne, 2002;Cody et al., 2020;Hungur et al., 2014) | B1-B4                 |
|            |                        | 2.2            | Gulley headward erosion                      | Strong headward erosion is added based on Type 2.1<br>Shape: triangle                                                     | C1-C3                 |

References

Ballantyne, C. K.: Paraglacial geomorphology, Quaternary Science Reviews, 21, 1935-2017, doi:10.1016/S0277-3791(02)00005-7, 2002.

65 Cody, E., Anderson, B. M., McColl, S. T., Fuller, I. C., and Purdie, H. L.: Paraglacial adjustment of sediment slopes during and immediately after glacial debuttreassing, Geomorphology, 371, 107411, doi:10.1016/j.geomorph.2020.107411, 2020.

Deline, P., Hewitt, K., Reznichenko, N., and Shugar, D.: Chapter 9 - Rock Avalanches onto Glaciers, in: Landslide Hazards, Risks and Disasters, edited by: Shroder, J. F., and Davies, T., Academic Press, Boston, 263-319, 2015.

70 Hungr, O., Leroueil, S., and Picarelli, L.: The Varnes classification of landslide types, an update, Landslides, 11, 167-194, doi:10.1007/s10346-013-0436-y, 2014.

McColl, S. T.: Paraglacial rock-slope stability, Geomorphology, 153-154, 1-16, doi:10.1016/j.geomorph.2012.02.015, 2012.
